# Supplementary material for: Female reoffending trajectories in England from 2000 to 2020: A longitudinal administrative data study
Source: Research Square preprint supplement (doi:10.21203/rs.3.rs-8115965/v1), 2025-11-25
Supplement: Supplementary file 1 [file 350ff88d1b089ecafc22ffca.docx]

**Supplementary materials**

**Figure S1.** *Flowchart to show data cleaning process*

**Table S1.** *Number of offenders in each academic year and length of follow-up information*

**Table S2.** *Conditional probabilities for 4 class model sensitivity analysis (N=197,075)*

**Table S3.** *Breakdown of offence types for female offending trajectories*

**Table S4.** *Academic year and total time in custody for female offending trajectory groups*

Original PNC sample: N=7,907,814 offences committed by N=710,877 individuals born from 1st September 1990 to 31st August 1997 with a record in the PNC

Remove N=723,274 offences (9.2%) not guilty, non-conviction and offences pending judgement

Remove breach offences and records for non-offences N=646,670 (9.0%)

Remove N=6,144 (0.9%) individuals with incorrect (<10 or >31 years) or missing offence age (N=126,266 offences [1.9%])

Remove N=16 (<0.01%) individuals with court caution or offence start dates before 2000 (N=671 offences [0.01%])

Remove N=8,835 (1.3%) individuals without a corresponding record in NPD census data (N=63,955 offences [1.0%])

Remove N=3,598 (0.5%) individuals with conflicting age in PNC and NPD (N=46,717 offences [0.7%])

Final sample of offenders

N=692,373

(N=6,303,882 offences)

Final female sample for latent class analysis

N=196,089

(N=966,481 offences)

*PNC data merged with NPD census data for further checking*

Final female sample for sensitivity analysis

N=197,075

**Figure S1.** *Flowchart to show data cleaning process*

**Table S1.** *Number of offenders in each academic year and length of follow-up information*

| Range of year of birth | Female offenders  n (%) | Age offence information potentially available until |
| --- | --- | --- |
| 01/09/90-31/08/91 | 40,264 (20.53) | 31 |
| 01/09/91-31/08/92 | 38,349 (19.56) | 30 |
| 01/09/92-31/08/93 | 33,700 (17.19) | 29 |
| 01/09/93-31/08/94 | 28,685 (14.63) | 28 |
| 01/09/94-31/08/95 | 23,299 (11.88) | 27 |
| 01/09/95-31/08/96 | 17,929 (9.14) | 26 |
| 01/09/96-31/08/97 | 13,863 (7.07) | 25 |

**Table S2.** *Conditional probabilities for 4 class model sensitivity analysis (N=197,075)*

|  | Life-course-persistent 11% (N=22,269) | Adolescent-limited  54% (N=106,609) | Young-adult- limited  16% (N=31,213) | Adult-onset  19% (N=36,984) |
| --- | --- | --- | --- | --- |
| *Indicator variables:* | | | | |
| First offence childhood (10-13 years) | 0.43 | 0.35 | **0.03** | **0.04** |
| First offence adolescence (14-17 years) | 0.57 | 0.66 | **0.12** | **0.13** |
| First offence young adulthood (18-20 years) | **0.00** | **0.00** | **0.85** | **0.10** |
| First offence adulthood (>21 years) | **0.00** | **0.00** | **0.00** | **0.74** |
| Last offence juvenile (10-17 years) | **0.00** | **0.98** | **0.00** | **0.00** |
| Last offence young adult (18-20 years) | 0.36 | **0.02** | **0.96** | **0.00** |
| Last offence adulthood (>21 years) | 0.64 | **0.00** | **0.04** | **1.00** |
| Juvenile persistence | **0.95** | 0.37 | **0.00** | **0.00** |
| Young Adult persistence | 0.46 | **0.00** | 0.44 | **0.05** |
| Adult persistence | 0.37 | **0.00** | **0.00** | 0.46 |

*Note:* %s below 0.30 or above 0.70 are presented in bold

**Table S3.** *Breakdown of offence types for female offending trajectories*

| *Trajectory:* | Life-course-persistent (N=22,118)  N (%) | Adolescent-limited (N=106,198)  N (%) | Young-adult- limited (N=31,055)  N (%) | Adult-onset (N=36,718)  N (%) |
| --- | --- | --- | --- | --- |
| *Offence type* | | | | |
| 01 Violence against the person | 26,042 (6) | 15,270 (6) | 5,360 (5) | 17,379 (8) |
| 02 Sexual offences | 306 (0.1) | 204 (0.1) | 239 (0.2) | 363 (0.2) |
| 03 Robbery | 5,593 (1) | 4,120 (2) | 420 (0.4) | 368 (0.2) |
| 04 Theft Offences | 101,426 (25) | 98,313 (41) | 17,781 (16) | 29,383 (13) |
| 05 Criminal damage and arson | 5,156 (1) | 4,316 (2) | 705 (1) | 1,092 (1) |
| 06 Drug offences | 19,186 (5) | 5,470 (2) | 5,606 (5) | 12,372 (6) |
| 07 Possession of weapons | 6,232(2) | 2,412 (1) | 1,338 (1) | 3,263 (1) |
| 08 Public order offences | 9,420 (2) | 3,386 (1) | 1,400 (1) | 3,628 (2) |
| 09 Miscellaneous crimes against society | 19,221 (5) | 5,493 (2) | 3,724 (3) | 8,992 (4) |
| 10 Fraud offences | 7,699 (2) | 2,269 (1) | 5,506 (5) | 8,578 (4) |
| 11 Summary offences excluding motoring | 178,205 (44) | 91,753 (39) | 44,152 (41) | 72,157 (33) |
| 12 Summary motoring offences | 22,929 (6) | 4,228 (2) | 22,107 (20) | 60,608 (28) |
| *Total offences** | 401,415 | 237,234 | 108,338 | 218,183 |

**Offence group ’20 Unknown offences’ removed due to counts under 10*

**Table S4.** *Academic year and total time in custody for female offending trajectory groups.*

| *Trajectory:* | Life-course-persistent (N=22,118) | Adolescent-limited (N=106,198) | Young-adult-limited (N=31,055) | Adult-onset (N=36,718) |
| --- | --- | --- | --- | --- |
| *Academic year:* | | | | |
| 01/09/90-31/08/91 | 5,017 (23%) | 20,444 (19%) | 6,332 (20%) | 8,471 (23%) |
| 01/09/91-31/08/92 | 4,562 (21%) | 20,739 (20%) | 5,602 (18%) | 7,446 (20%) |
| 01/09/92-31/08/93 | 3,831 (17%) | 18,978 (18%) | 4,752 (15%) | 6,139 (17%) |
| 01/09/93-31/08/94 | 3,084 (14%) | 16,547 (16%) | 4,045 (13%) | 5,009 (14%) |
| 01/09/94-31/08/95 | 2,427 (11%) | 13,172 (12%) | 3,721 (12%) | 3,979 (11%) |
| 01/09/95-31/08/96 | 1,777 (8%) | 9,591 (9%) | 3,359(11%) | 3,202 (9%) |
| 01/09/96-31/08/97 | 1,420 (6%) | 6,727 (6%) | 3,244 (10%) | 2,472 (7%) |
| *Total time in custody:* | | | | |
| No custodial sentence | 17,881 (81%) | 105,531 (99%) | 30,122 (97%) | 34,893 (95%) |
| Up to and incl. 6 months | 940 (4%) | 127 (0.1%) | 227 (1%) | 426 (1%) |
| Over 6 months to 12 months | 664 (3%) | 184 (0.2%) | 183 (1%) | 295 (1%) |
| 12-24 months | 715(3%) | 121 (0.1%) | 151 (0.5%) | 266 (1%) |
